# Supplementary material
Source: Research Square preprint supplement (doi:10.21203/rs.3.rs-8797816/v1)
Supplement: Supplementary file 1 [file 30f5ecf52c1d6c37bb4e1606.docx]

Table S1. Stratified associations of admission markers with in-hospital mortality by HbA1c status (Training and Validation)

Panel A. Training cohort

| Stratum | n | Events | Exposure | Unadjusted OR (95% CI) | P | Adjusted OR (95% CI) | P |
| --- | --- | --- | --- | --- | --- | --- | --- |
| HbA1c <6.5% | 422 | 25 | PaCO2_high | 5.64 (2.25, 13.47) | 0.000 | 6.08 (1.95, 17.65) | 0.001 |
| HbA1c <6.5% | 422 | 25 | PCT_val | 1.08 (1.01, 1.15) | 0.014 | 1.08 (1.00, 1.15) | 0.032 |
| HbA1c <6.5% | 422 | 25 | DD_val | 1.17 (1.03, 1.31) | 0.010 | 1.13 (0.98, 1.28) | 0.056 |
| HbA1c ≥6.5% | 113 | 3 | PaCO2_high | 2.56 (0.12, 28.08) | 0.453 | 1.05 (0.02, 18.87) | 0.978 |
| HbA1c ≥6.5% | 113 | 3 | PCT_val | 1.07 (0.89, 1.21) | 0.235 | 1.25 (0.96, 1.61) | 0.060 |
| HbA1c ≥6.5% | 113 | 3 | DD_val | 1.06 (0.37, 1.75) | 0.862 | 1.13 (0.38, 1.95) | 0.721 |

Panel B. Validation cohort

| Stratum | n | Events | Exposure | Unadjusted OR (95% CI) | P | Adjusted OR (95% CI) | P |
| --- | --- | --- | --- | --- | --- | --- | --- |
| HbA1c <6.5% | 227 | 11 | PaCO2_high | 3.67 (0.76, 13.89) | 0.0693 | 4.96 (0.89, 22.64) | 0.046 |
| HbA1c <6.5% | 227 | 11 | PCT_val | 1.04 (0.89, 1.16) | 0.569 | 1.03 (0.88, 1.16) | 0.636 |
| HbA1c <6.5% | 227 | 11 | DD_val | 1.15 (0.95, 1.34) | 0.097 | 1.11 (0.90, 1.31) | 0.258 |
| HbA1c ≥6.5% | 66 | 5 | PaCO2_high | 1.66 (0.08, 13.13) | 0.669 | 0.00 (NA, Inf)† | 0.996 |
| HbA1c ≥6.5% | 66 | 5 | PCT_val | 1.16 (0.83, 1.53) | 0.298 | 1.53 (0.94, 2.91) | 0.095 |
| HbA1c ≥6.5% | 66 | 5 | DD_val | 1.09 (0.62, 1.55) | 0.682 | 1.10 (0.41, 1.91) | 0.775 |

Table S2. Stratified associations of admission markers with in-hospital mortality by age group (Training cohort)

Training cohort

| Stratum | n | Events | Exposure | Unadjusted OR (95% CI) | P | Adjusted OR (95% CI) | P |
| --- | --- | --- | --- | --- | --- | --- | --- |
| Age <75 | 141 | 7 | PaCO2_high | 19.83 (3.91, 147.39) | 0.0007 | 20.41 (3.08, 177.42) | 0.002 |
| Age <75 | 141 | 7 | PCT_val | 1.07 (1.00, 1.15) | 0.0359 | 1.05 (0.91, 1.15) | 0.353 |
| Age <75 | 141 | 7 | DD_val | 1.34 (0.91, 1.83) | 0.0777 | 1.62 (1.01, 2.55) | 0.029 |
| Age ≥75 | 394 | 21 | PaCO2_high | 2.68 (0.84, 7.27) | 0.0681 | 1.83 (0.41, 6.25) | 0.377 |
| Age ≥75 | 394 | 21 | PCT_val | 1.09 (0.98, 1.19) | 0.0674 | 1.10 (0.99, 1.20) | 0.044 |
| Age ≥75 | 394 | 21 | DD_val | 1.16 (1.01, 1.31) | 0.022 | 1.14 (0.98, 1.29) | 0.051 |

Supplementary Notes (for Tables S1 and S2)

Note: Values are odds ratios (ORs) with 95% confidence intervals (CIs) from logistic regression. “Unadjusted” models included only the exposure; “Adjusted” models included prespecified covariates as stated above. PCT_val and DD_val were analyzed on their original scales (per 1-unit increase). Estimates in strata with few events should be interpreted as exploratory due to potential sparse-data bias and wide CIs.
